# Supplementary material for: Upgrading furfural to bio-fuels using supported molybdenum carbides: study of the support effect
Source: PubMed Central journal article supplement — RSC Adv. 2024 Aug 27;14(37):26920–32. doi: 10.1039/d4ra04256e (PMC11347982; doi:10.1039/d4ra04256e), 2024-08-27
Supplement: RA-014-D4RA04256E-s001.pdf [file RA-014-D4RA04256E-s001.pdf]

## Supporting information

### **Hydrodeoxygenation of furfural to 2-methylfuran using supported molybdenum carbides: Study of the support effect**

Leticia F. Sosa<sup>1</sup>, Priscilla M. de Souza<sup>2</sup>, Raphaela A. Rafael<sup>2</sup>, Eric Marceau<sup>2</sup>, Valérie Briois<sup>3</sup>, Fabio S. Toniolo<sup>1</sup>, Fabio B. Noronha<sup>2,4</sup>, Franck Dumeignil<sup>2</sup>, Sébastien Paul<sup>2\*</sup>

<sup>1</sup> Chemical Engineering Program of COPPE/UFRJ, Federal University of Rio Janeiro, P.O. Box 68502, CEP 21941-972, Rio de Janeiro, Brazil.

<sup>2</sup> Univ. Lille, CNRS, Centrale Lille, Univ. Artois, UMR 8181 - UCCS - Unité de Catalyse et Chimie du Solide, F-59000 Lille, France.

<sup>3</sup> Synchrotron SOLEIL, L'Orme des Merisiers, Saint-Aubin, BP 48, 91192 Gif-sur-Yvette Cedex, France.

<sup>4</sup> National Institute of Technology, Catalysis, Biocatalysis and Chemical Processes Division, Av. Venezuela 82, 20081-312, Rio de Janeiro, RJ, Brazil.

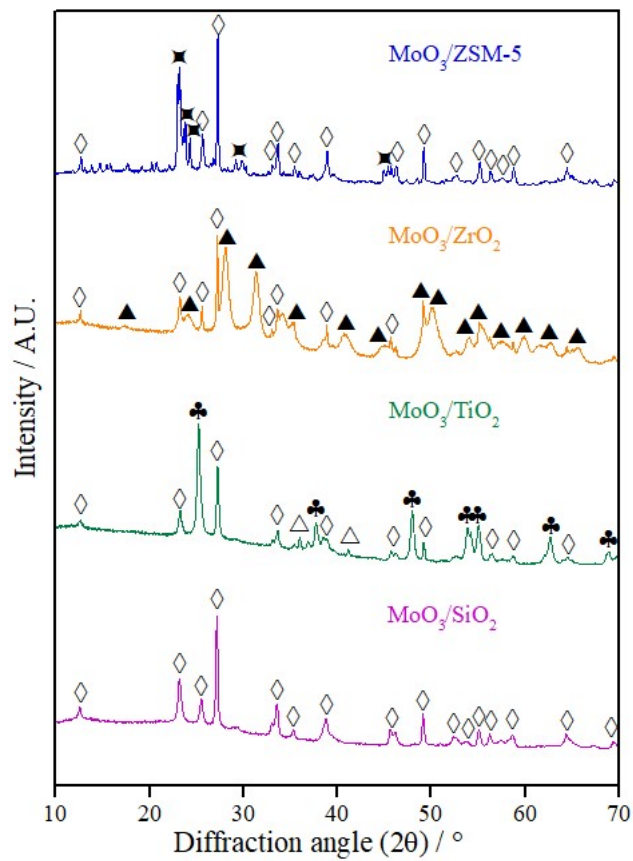

**Figure S1.** Diffractograms of the calcined precursors of Mo carbides supported on different materials. ◊ MoO<sub>3</sub>, ◻ ZSM-5, ▲ m-ZrO<sub>2</sub>, ♣ a-TiO<sub>2</sub>, ◻ r-TiO<sub>2</sub>

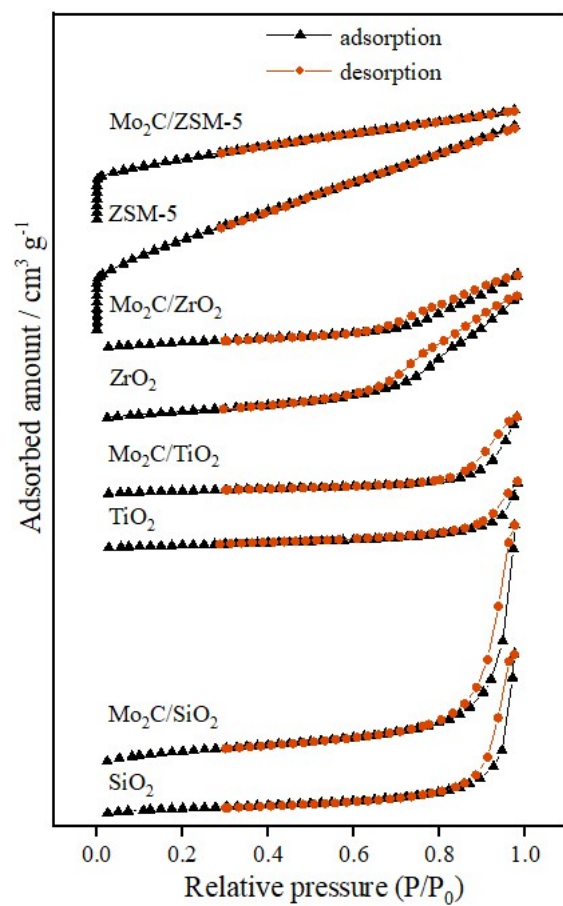

**Figure S2.** N<sub>2</sub> adsorption-desorption isotherms of the passivated Mo carbides and respective supports.

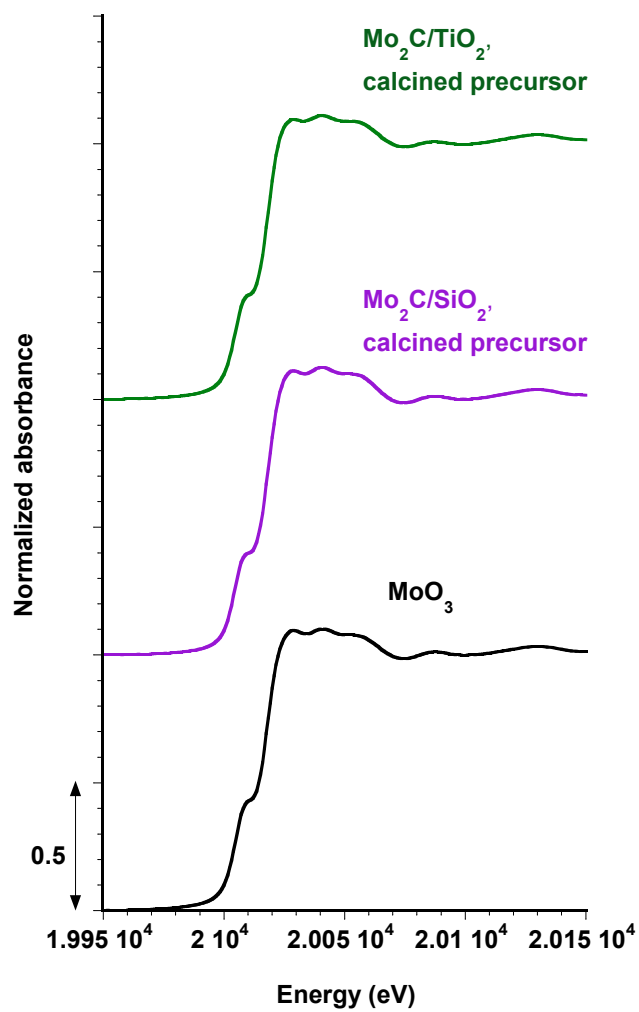

**Figure S3.** XANES spectra recorded at the Mo K-edge for the calcined precursors of  $\text{Mo}_2\text{C}/\text{SiO}_2$  and  $\text{Mo}_2\text{C}/\text{TiO}_2$ . Comparison with reference  $\text{MoO}_3$ .

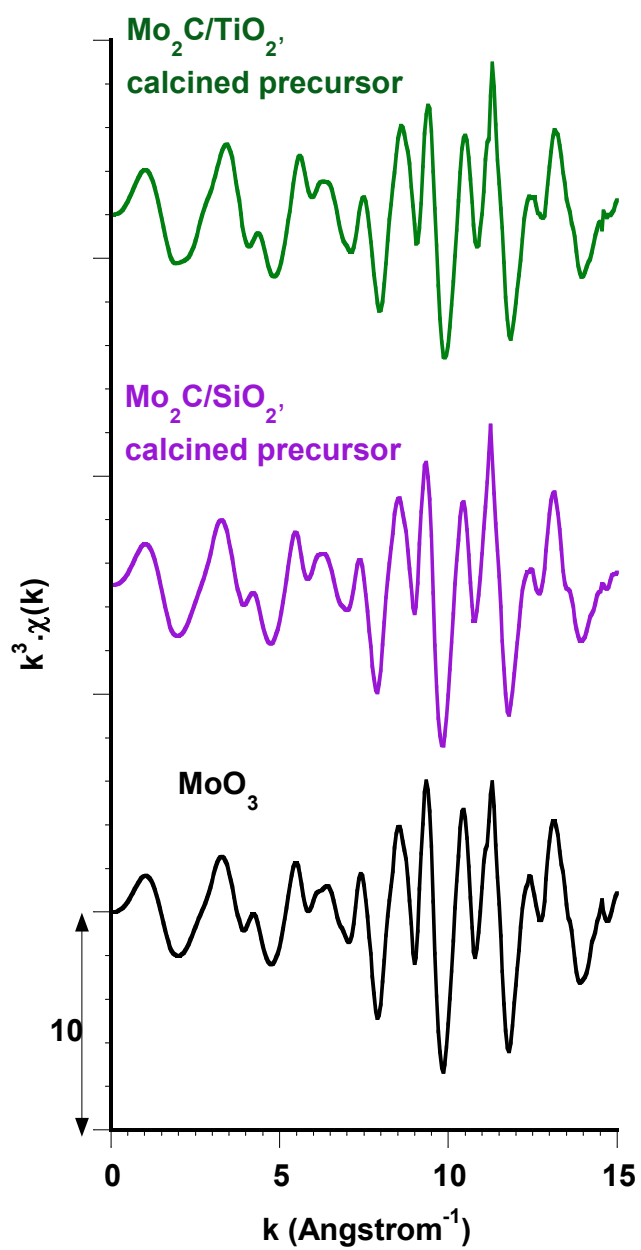

**Figure S4.** EXAFS signals recorded at the Mo K-edge for the calcined precursors of  $\text{Mo}_2\text{C}/\text{SiO}_2$  and  $\text{Mo}_2\text{C}/\text{TiO}_2$ . Comparison with reference  $\text{MoO}_3$ .

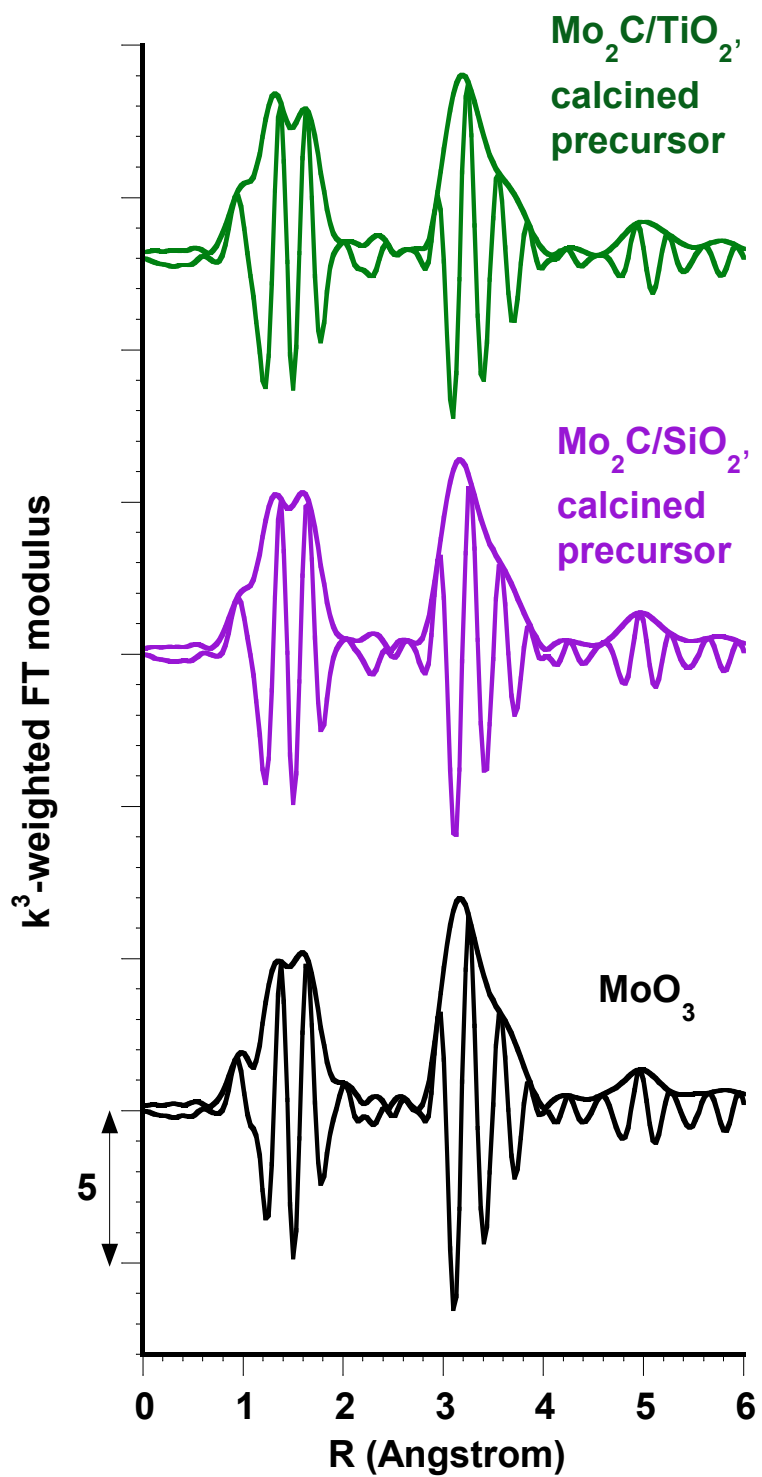

**Figure S5.** Fourier transforms of the EXAFS signals recorded at the Mo K-edge for the calcined precursors of  $\text{Mo}_2\text{C}/\text{SiO}_2$  and  $\text{Mo}_2\text{C}/\text{TiO}_2$  ( $k = 3.5 - 15 \text{ \AA}^{-1}$ ). Comparison with reference  $\text{MoO}_3$ .

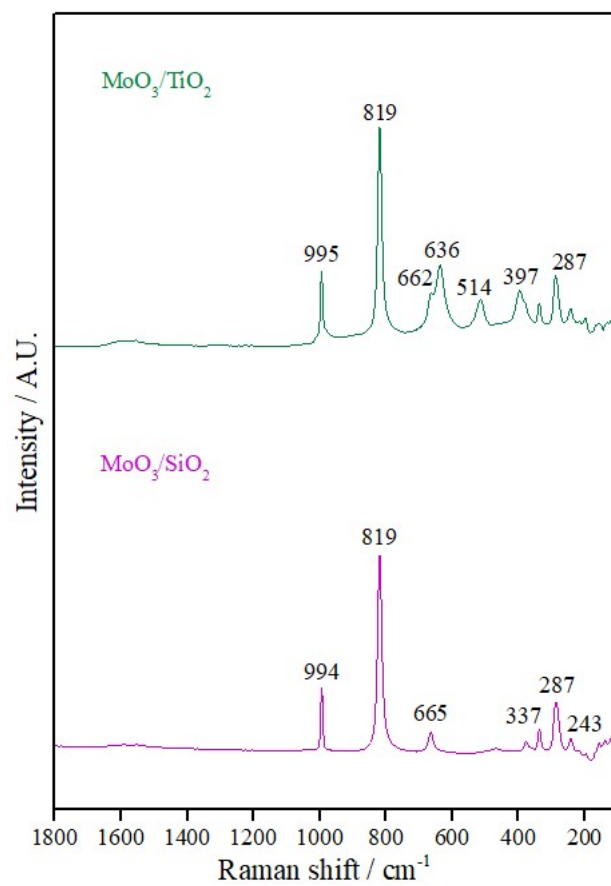

**Figure S6.** Raman spectra of the calcined precursors of  $\text{Mo}_2\text{C}/\text{SiO}_2$  and  $\text{Mo}_2\text{C}/\text{TiO}_2$  (recorded at room temperature).

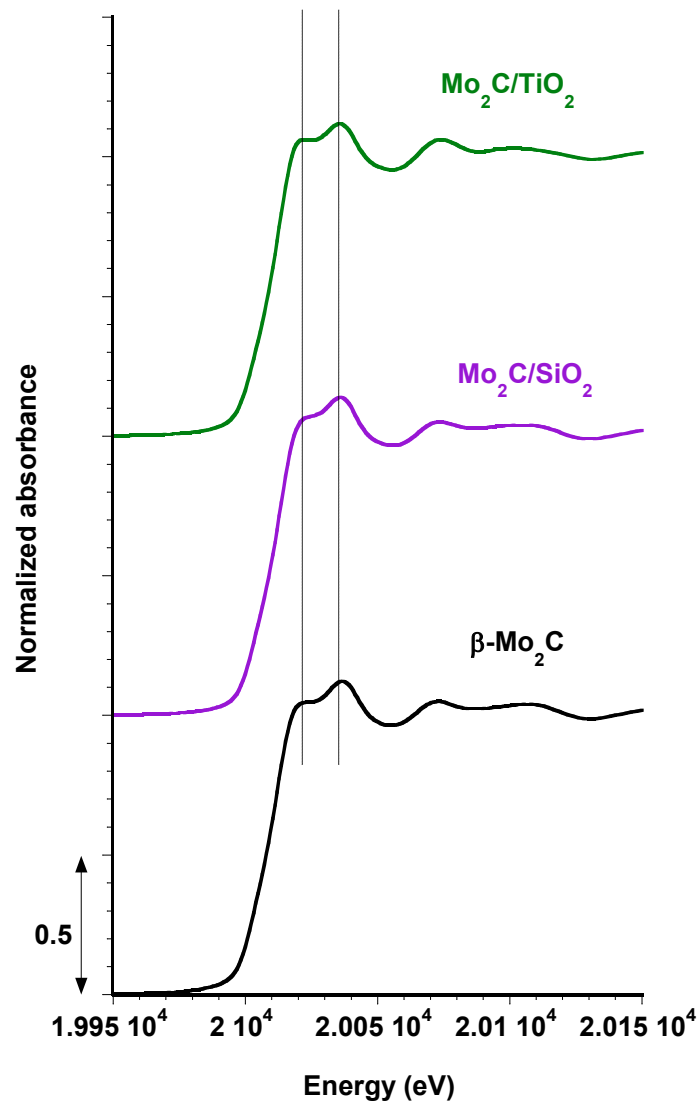

**Figure S7.** XANES spectra recorded at the Mo K-edge for carburized  $\text{Mo}_2\text{C}/\text{SiO}_2$  and  $\text{Mo}_2\text{C}/\text{TiO}_2$  (spectra recorded at room temperature). Comparison with reference  $\beta\text{-Mo}_2\text{C}$ .



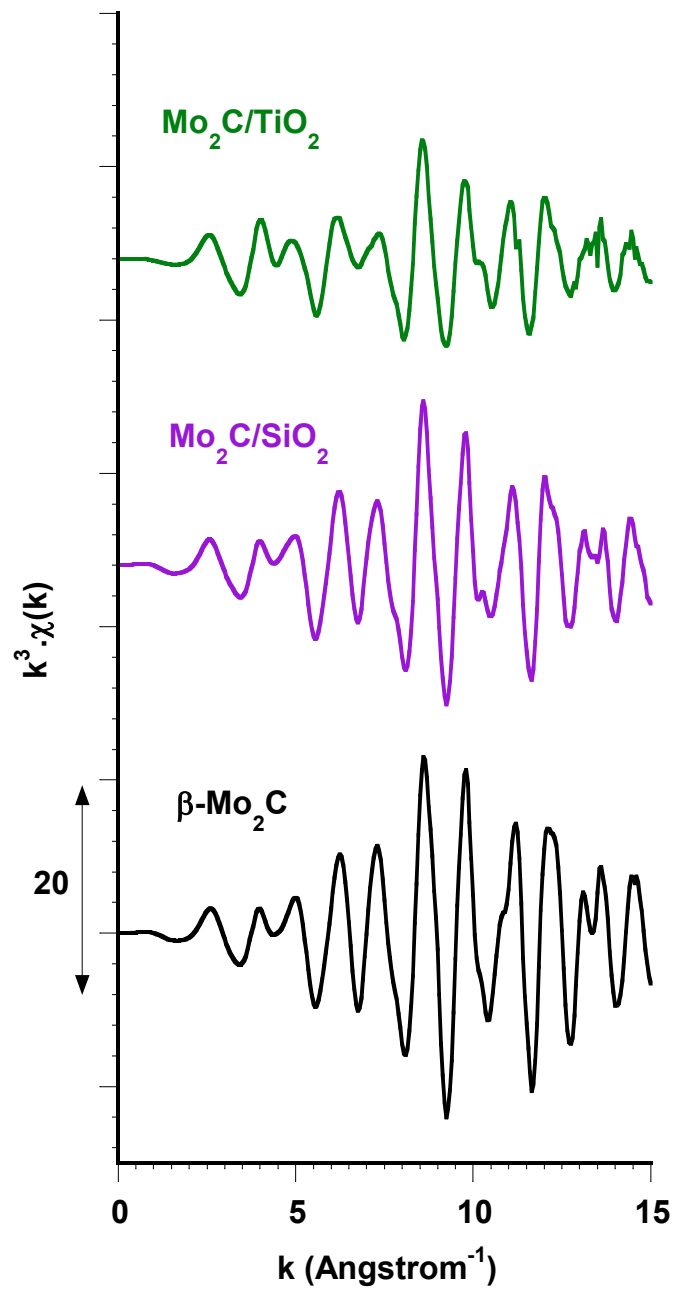

**Figure S8.** EXAFS signals recorded at the Mo K-edge for carburized  $\text{Mo}_2\text{C}/\text{SiO}_2$  and  $\text{Mo}_2\text{C}/\text{TiO}_2$  (spectra recorded at room temperature).

Comparison with reference  $\beta\text{-Mo}_2\text{C}$ .

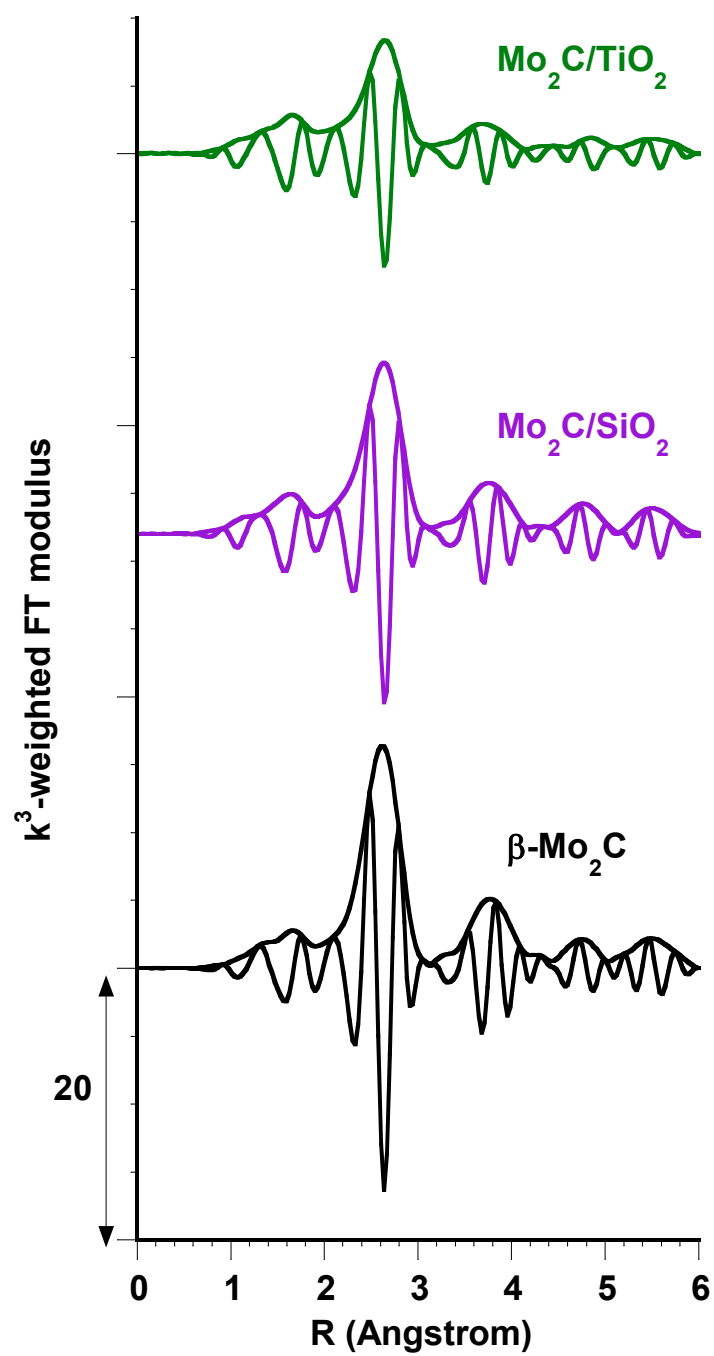

**Figure S9.** Fourier transforms of the EXAFS signals recorded at the Mo K-edge for carburized  $\text{Mo}_2\text{C}/\text{SiO}_2$  and  $\text{Mo}_2\text{C}/\text{TiO}_2$  (spectra recorded at room temperature,  $k = 3.5 - 15 \text{ \AA}^{-1}$ ). Comparison with reference  $\beta\text{-Mo}_2\text{C}$ .

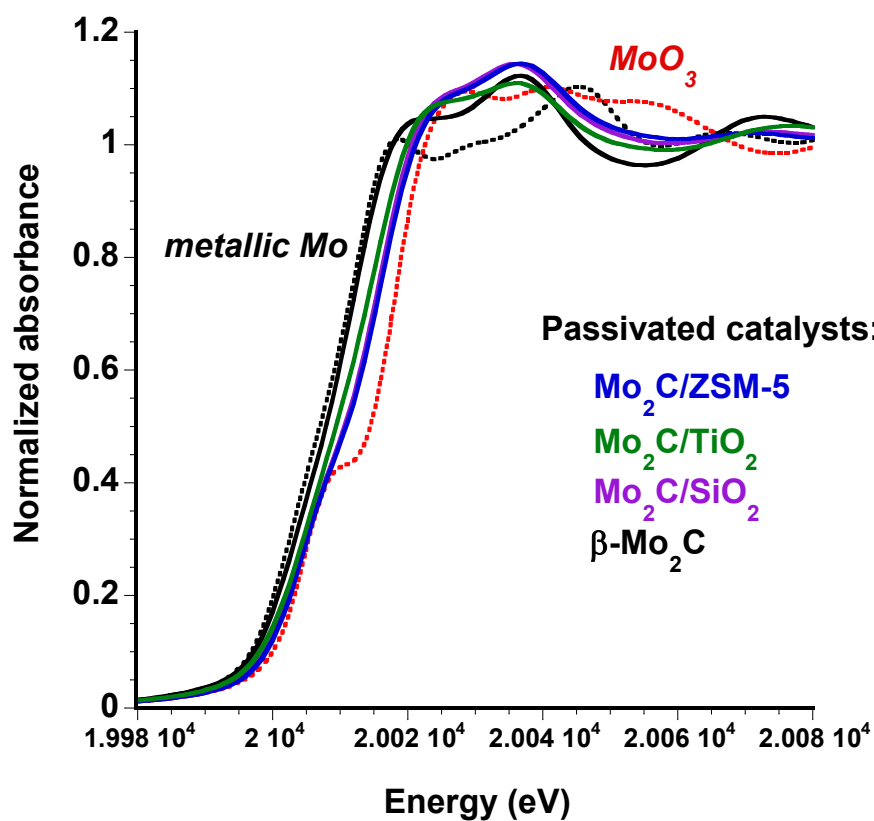

**Figure S10.** XANES spectra recorded at the Mo K-edge for passivated  $\beta$ -Mo<sub>2</sub>C, Mo<sub>2</sub>C/SiO<sub>2</sub>, Mo<sub>2</sub>C/TiO<sub>2</sub>, and Mo<sub>2</sub>C/ZSM-5 (spectra recorded at room temperature).

Comparison with references MoO<sub>3</sub> and metallic Mo (dotted lines).

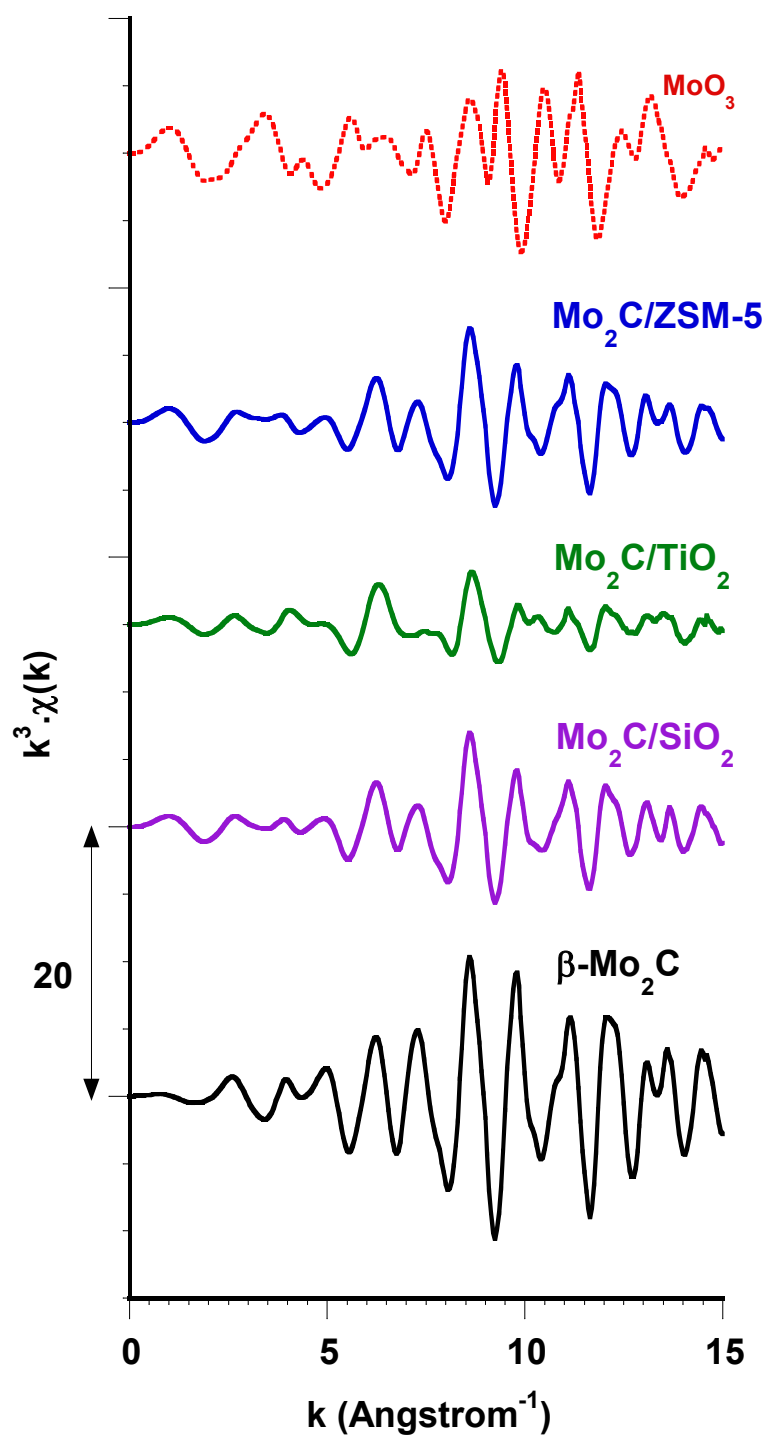

**Figure S11.** EXAFS signals recorded at the Mo K-edge for passivated  $\beta\text{-Mo}_2\text{C}$ ,  $\text{Mo}_2\text{C}/\text{SiO}_2$ ,  $\text{Mo}_2\text{C}/\text{TiO}_2$ , and  $\text{Mo}_2\text{C}/\text{ZSM-5}$  (spectra recorded at room temperature).

Comparison with reference  $\text{MoO}_3$ .

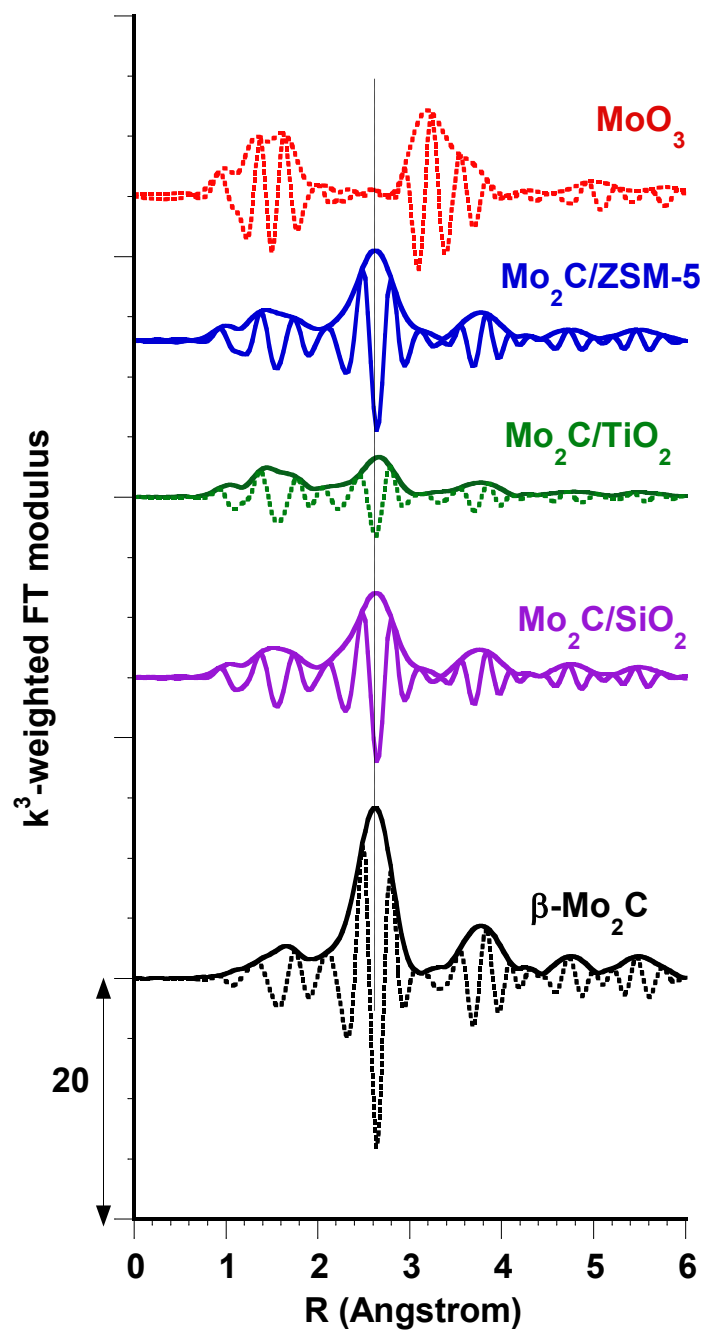

**Figure S12.** Fourier transforms of the EXAFS signals recorded at the Mo K-edge for passivated  $\beta$ -Mo<sub>2</sub>C, Mo<sub>2</sub>C/SiO<sub>2</sub>, Mo<sub>2</sub>C/TiO<sub>2</sub>, and Mo<sub>2</sub>C/ZSM-5 (spectra recorded at room temperature). Comparison with reference MoO<sub>3</sub>.

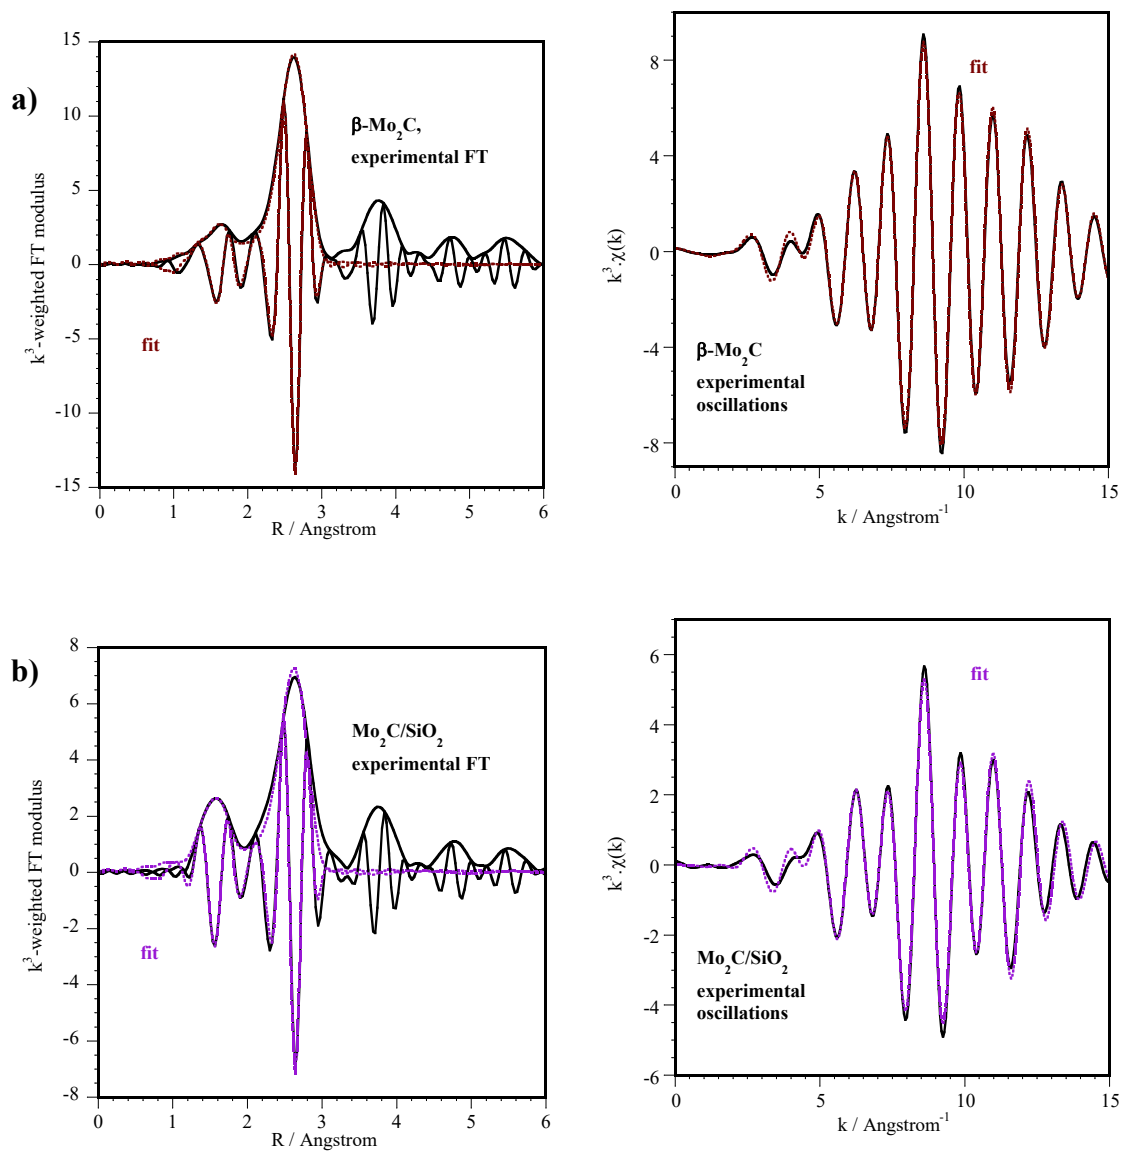

**Figure S13.** Analysis of the data recorded at the Mo K-edge for the passivated catalysts (spectra recorded at room temperature), using linear combinations of MCR-ALS components (see Table S1). XANES spectrum (left) and EXAFS oscillations (right), a)  $\beta$ -Mo<sub>2</sub>C and b) Mo<sub>2</sub>C/SiO<sub>2</sub>.

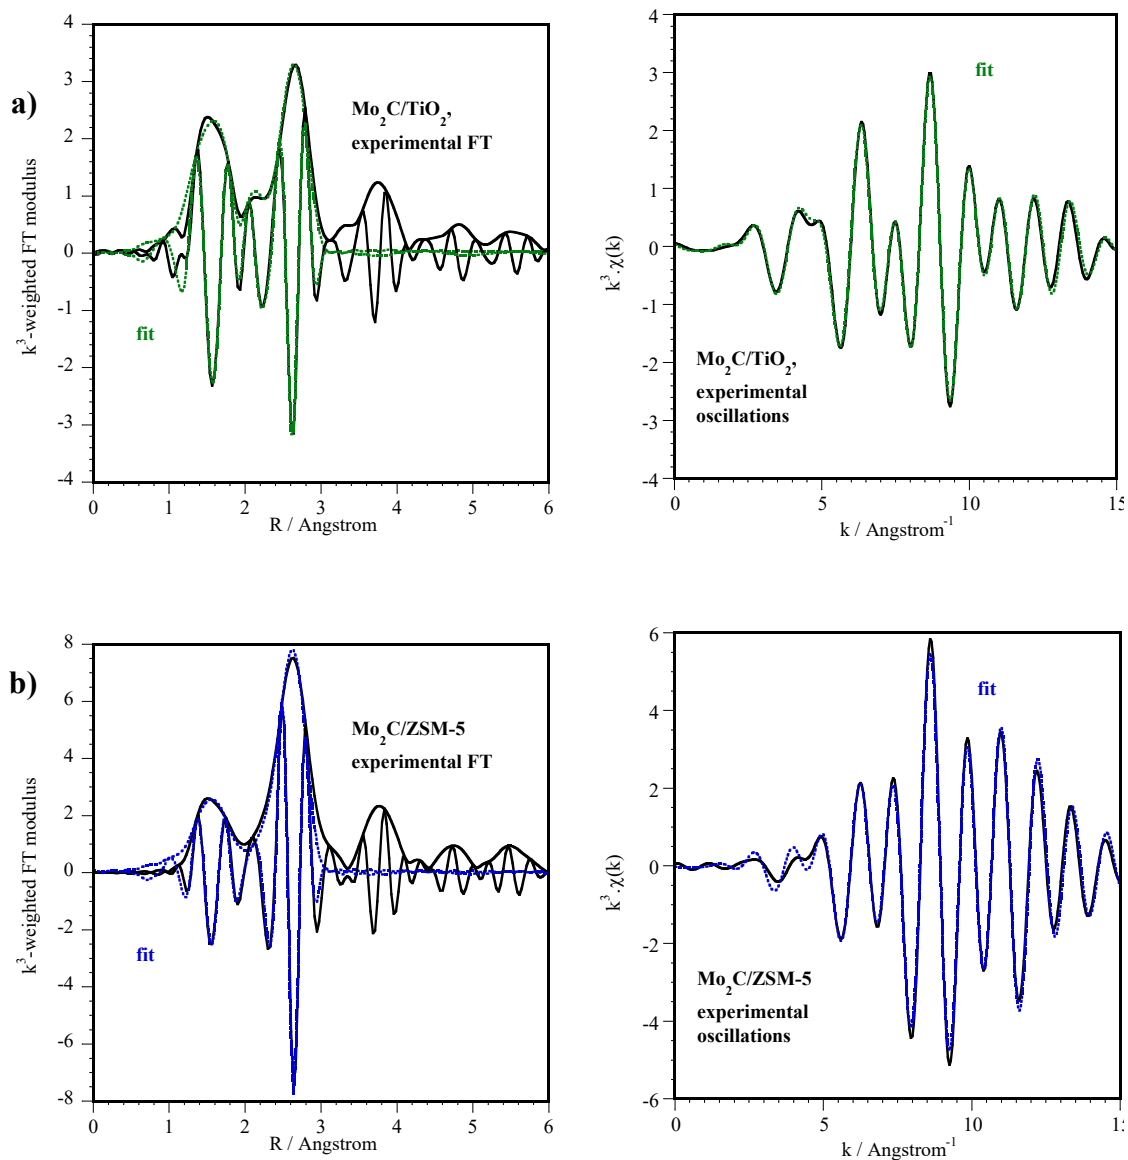

**Continuation of Figure S13.** Analysis of the data recorded at the Mo K-edge for the passivated catalysts (spectra recorded at room temperature), using linear combinations of MCR-ALS components (see Table S1). XANES spectrum (left) and EXAFS oscillations (right),  $\text{Mo}_2\text{C}/\text{TiO}_2$ , and b)  $\text{Mo}_2\text{C}/\text{ZSM-5}$ .

**Table S1.** Fitted parameters at the Mo K-edge ( $E_0 = 20013$  eV,  $S_0^2 = 0.98$ ) determined from the EXAFS analysis of spectra recorded at room temperature on catalysts after passivation.  $k = 3.5 - 15 \text{ \AA}^{-1}$ . Fit of the first peak(s) from the Fourier transform between 1 and 3  $\text{\AA}$ .

| Catalyst                                                                                                   | Backscatterer | N             | $\sigma^2 (\text{\AA}^2) \times 10^3$ | R ( $\text{\AA}$ ) |
|------------------------------------------------------------------------------------------------------------|---------------|---------------|---------------------------------------|--------------------|
| $\beta$ -Mo <sub>2</sub> C                                                                                 | C             | $2.9 \pm 0.9$ | $5 \pm 3$                             | $2.09 \pm 0.02$    |
|                                                                                                            | Mo            | $6.8 \pm 0.8$ | $6.4 \pm 0.6$                         | $2.971 \pm 0.005$  |
| $\Delta E_0 = -4.9$ eV, r-factor = 0.01493, $\chi^2 = 646$ , $N_{\text{ind}} = 13$ , $N_{\text{var}} = 7$  |               |               |                                       |                    |
| Mo <sub>2</sub> C/SiO <sub>2</sub>                                                                         | O             | $0.9 \pm 0.9$ | $7 \pm 5$                             | $1.71 \pm 0.04$    |
|                                                                                                            | C             | $4 \pm 3$     | $7 \pm 5$                             | $2.08 \pm 0.02$    |
|                                                                                                            | Mo            | $4 \pm 1$     | $7 \pm 2$                             | $2.97 \pm 0.01$    |
| $\Delta E_0 = -5.2$ eV, r-factor = 0.03112, $\chi^2 = 1745$ , $N_{\text{ind}} = 13$ , $N_{\text{var}} = 9$ |               |               |                                       |                    |
| Mo <sub>2</sub> C/TiO <sub>2</sub>                                                                         | O             | $0.8 \pm 0.4$ | $8 \pm 2$                             | $1.69 \pm 0.03$    |
|                                                                                                            | C             | $3.7 \pm 0.7$ | $8 \pm 2$                             | $2.13 \pm 0.02$    |
|                                                                                                            | Mo            | $0.4 \pm 0.2$ | $8 \pm 2$                             | $2.52 \pm 0.03$    |
|                                                                                                            | Mo            | $2.1 \pm 0.5$ | $8 \pm 2$                             | $2.97 \pm 0.01$    |
| $\Delta E_0 = -0.4$ eV, r-factor = 0.01268, $\chi^2 = 708$ , $N_{\text{ind}} = 13$ , $N_{\text{var}} = 10$ |               |               |                                       |                    |
| Mo <sub>2</sub> C/ZSM-5                                                                                    | O             | $0.9 \pm 0.9$ | $6 \pm 4$                             | $1.71 \pm 0.03$    |
|                                                                                                            | C             | $3 \pm 2$     | $6 \pm 4$                             | $2.10 \pm 0.02$    |
|                                                                                                            | Mo            | $3.9 \pm 0.9$ | $7 \pm 1$                             | $2.969 \pm 0.009$  |
| $\Delta E_0 = -5.3$ eV, r-factor = 0.02999, $\chi^2 = 1515$ , $N_{\text{ind}} = 13$ , $N_{\text{var}} = 9$ |               |               |                                       |                    |



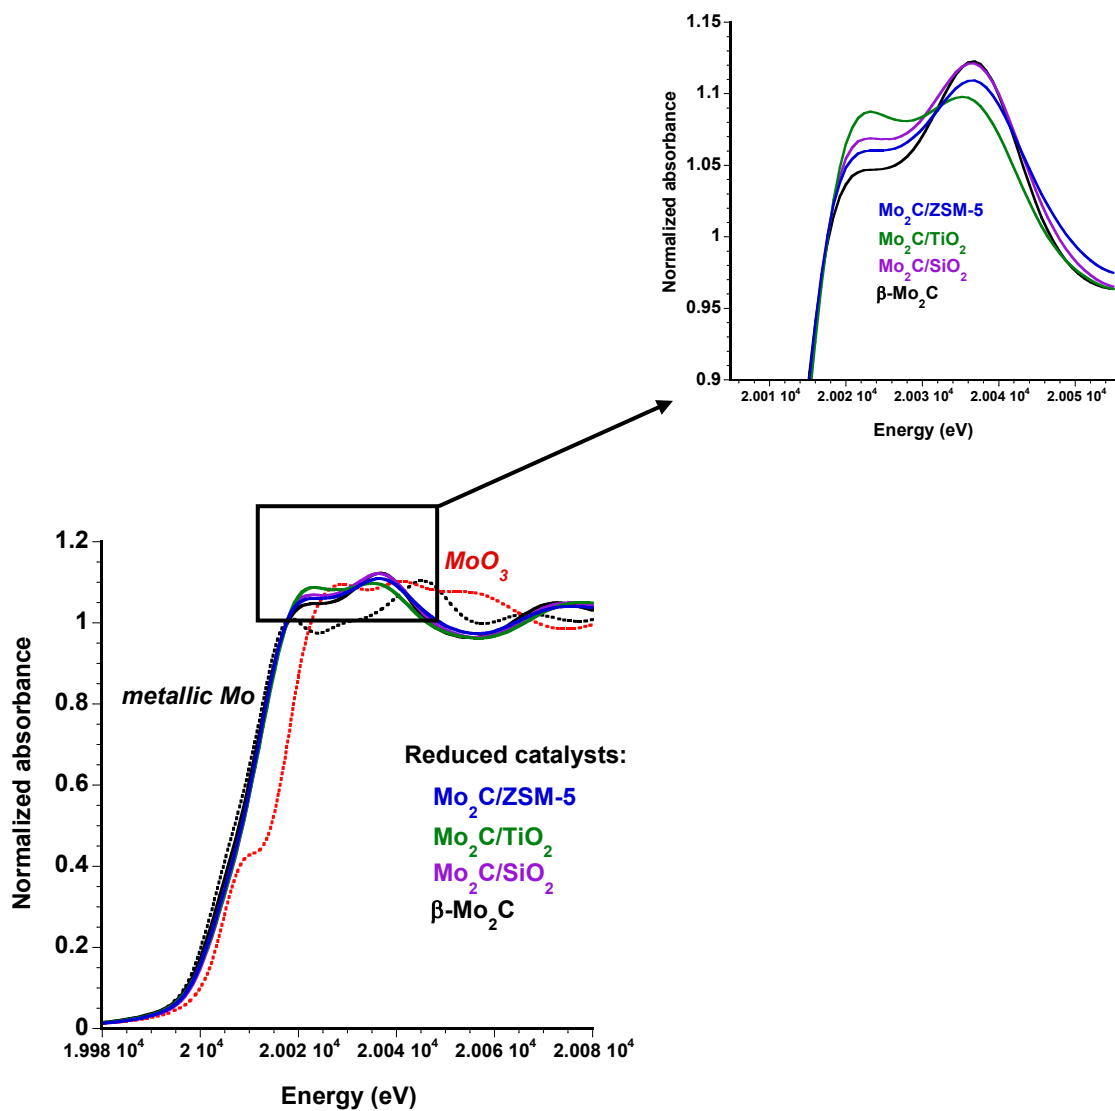

**Figure S14.** XANES spectra recorded at the Mo K-edge for reduced  $\beta$ -Mo<sub>2</sub>C, Mo<sub>2</sub>C/SiO<sub>2</sub>, Mo<sub>2</sub>C/TiO<sub>2</sub>, and Mo<sub>2</sub>C/ZSM-5 (spectra recorded at room temperature). Comparison with references MoO<sub>3</sub> and metallic Mo (dotted lines).

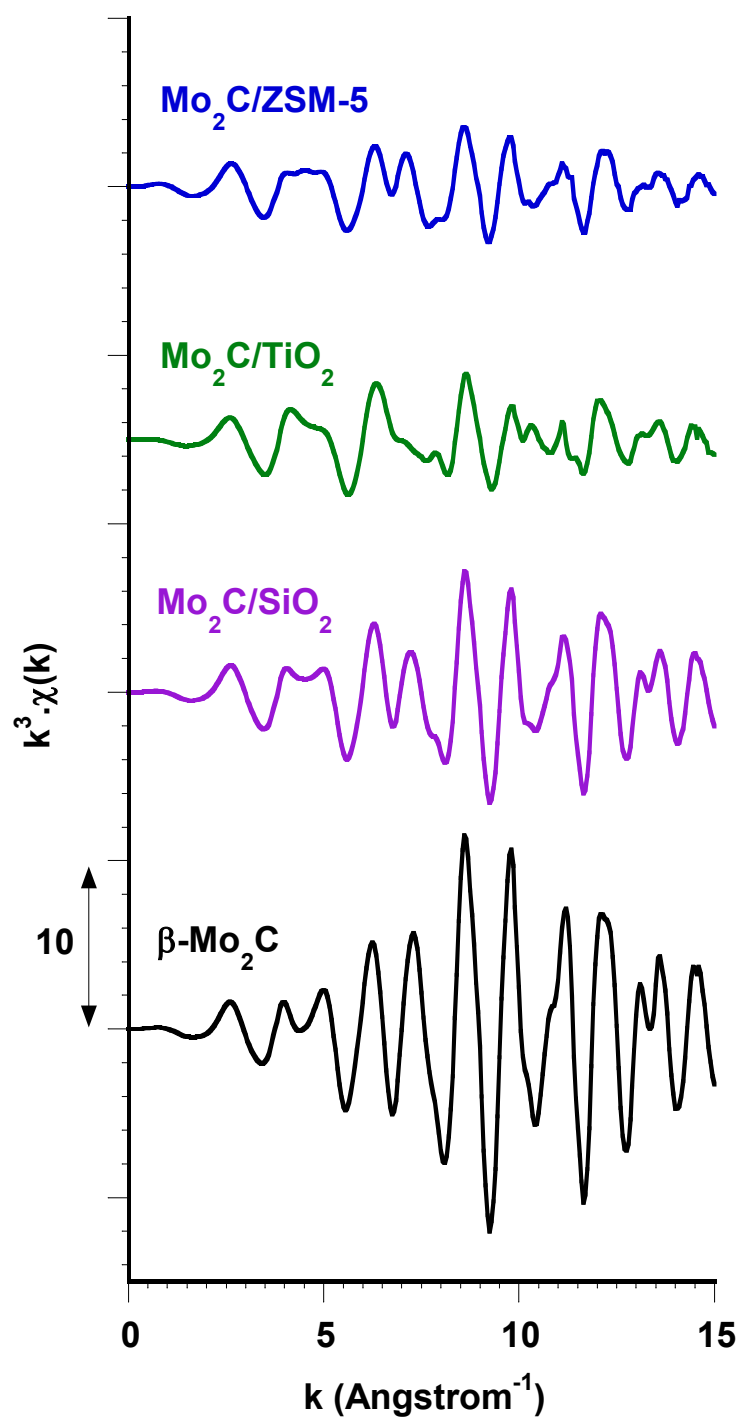

**Figure S15.** EXAFS signals recorded at the Mo K-edge for reduced  $\beta\text{-Mo}_2\text{C}$ ,  $\text{Mo}_2\text{C}/\text{SiO}_2$ ,  $\text{Mo}_2\text{C}/\text{TiO}_2$ , and  $\text{Mo}_2\text{C}/\text{ZSM-5}$  (spectra recorded at room temperature).

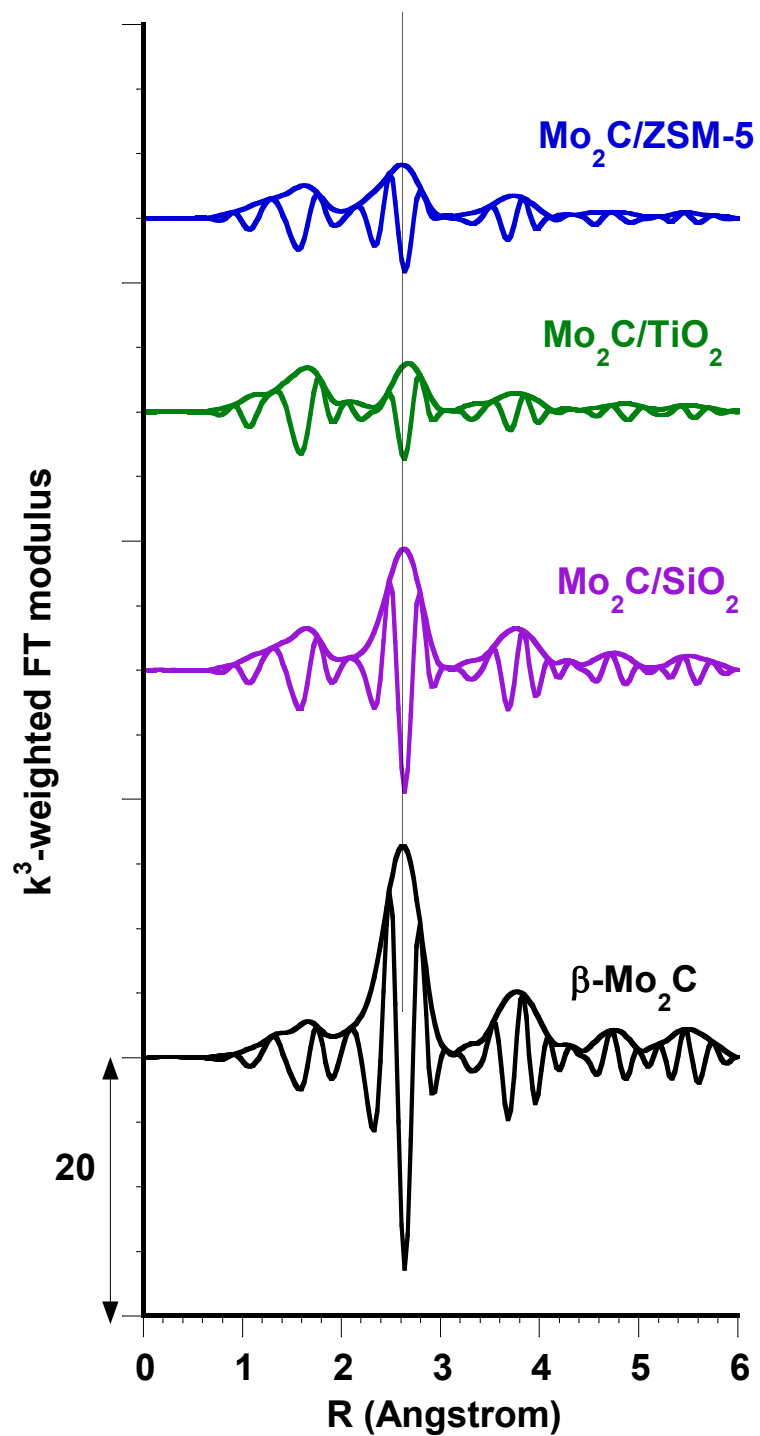

**Figure S16.** Fourier transforms of the EXAFS signals recorded at the Mo K-edge for reduced  $\beta\text{-Mo}_2\text{C}$ ,  $\text{Mo}_2\text{C}/\text{SiO}_2$ ,  $\text{Mo}_2\text{C}/\text{TiO}_2$ , and  $\text{Mo}_2\text{C}/\text{ZSM-5}$  (spectra recorded at room temperature).

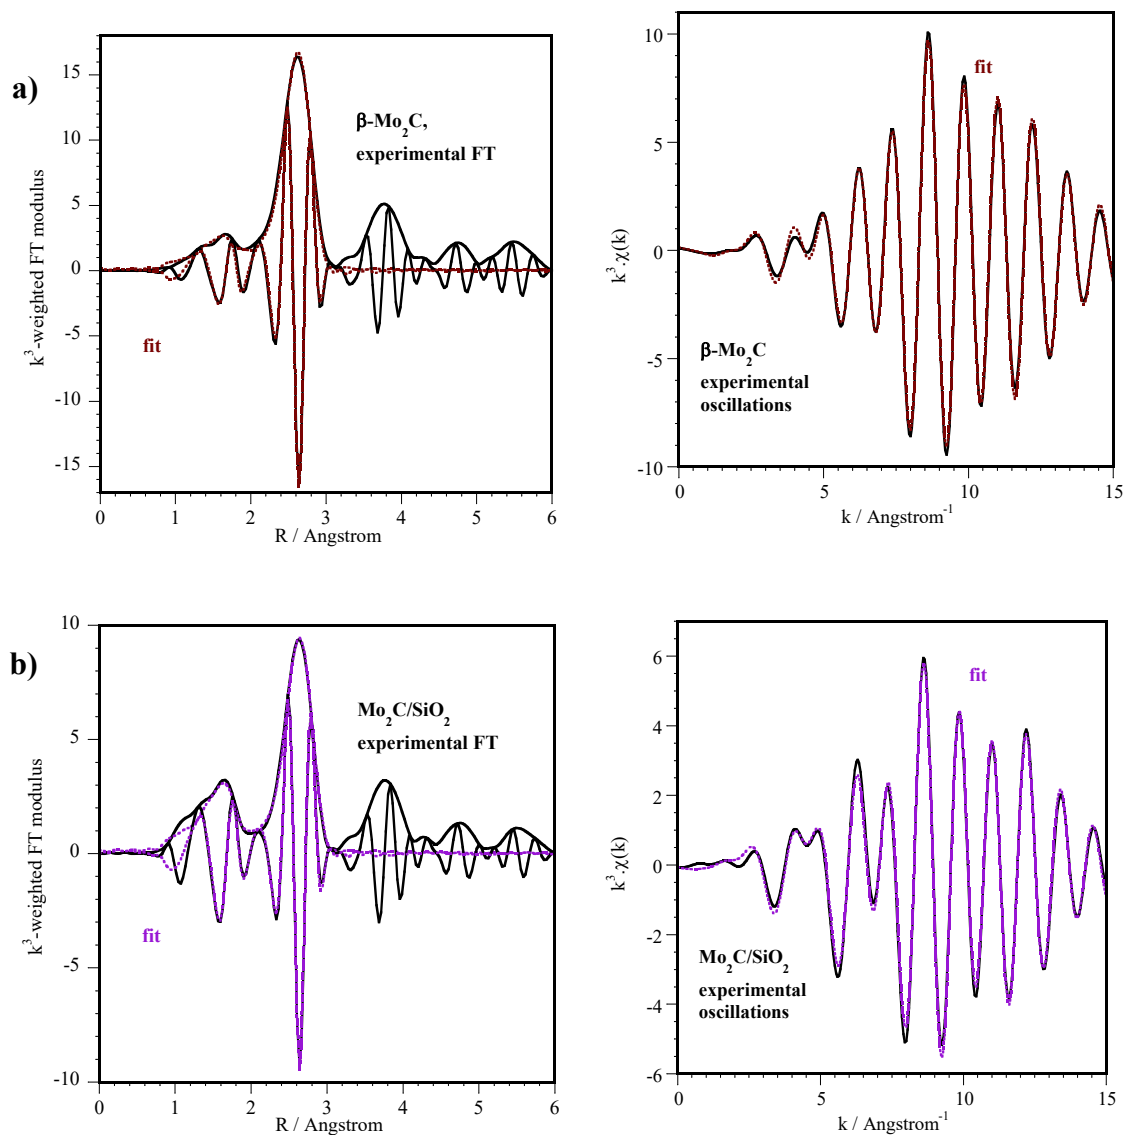

**Figure S17.** XAS data at the Mo K-edge of the catalysts after reduction (spectrum recorded at room temperature). Fit of the first and second shells of neighbors: Fourier transform (left) and EXAFS oscillations (right), a)  $\beta\text{-Mo}_2\text{C}$  and b)  $\text{Mo}_2\text{C}/\text{SiO}_2$ .

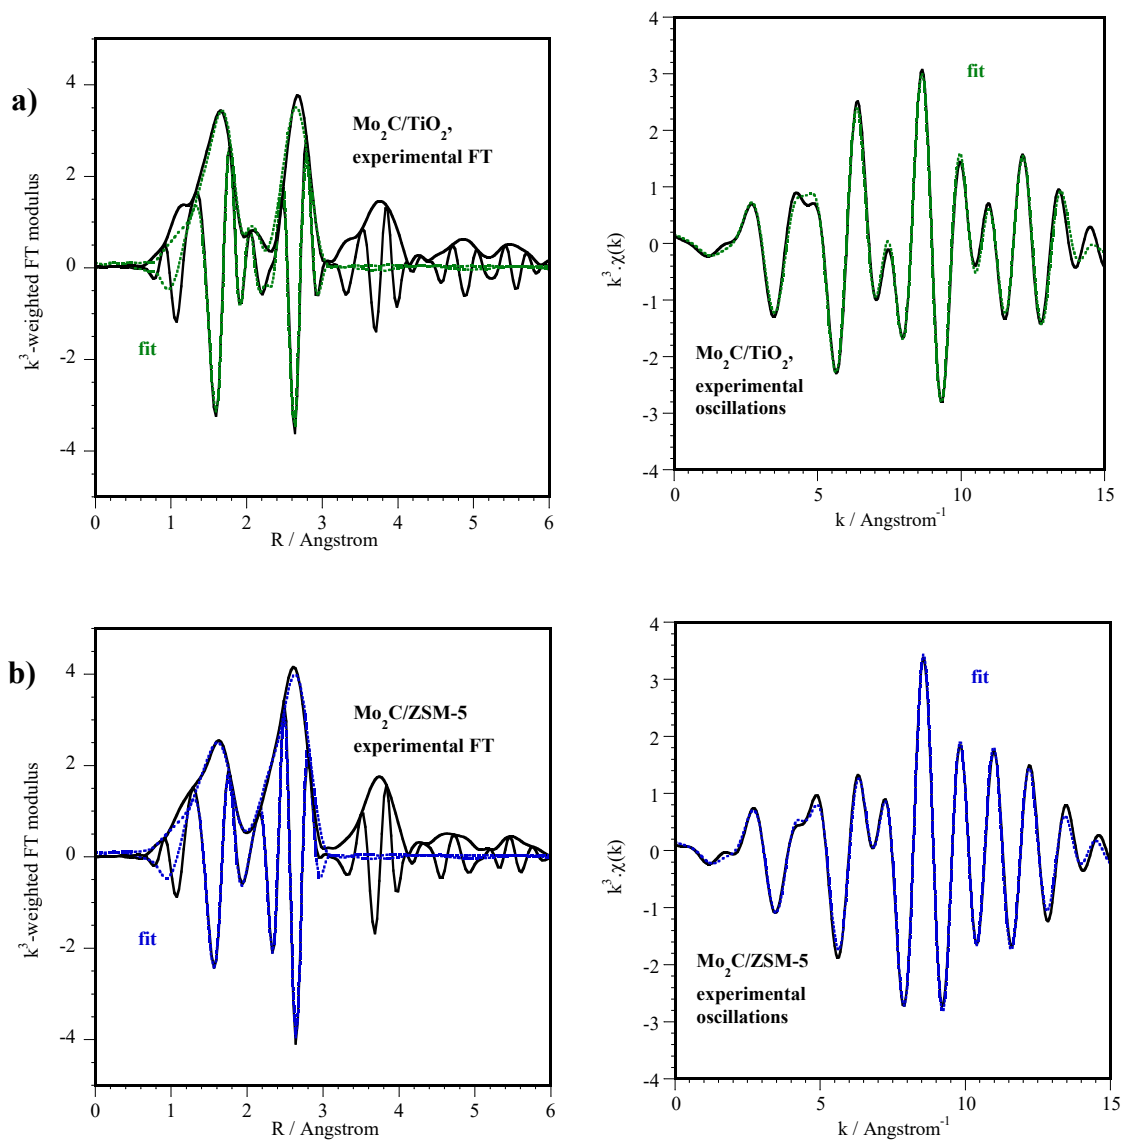

**Continuation of Figure S17.** XAS data at the Mo K-edge of the catalysts after reduction (spectrum recorded at room temperature). Fit of the first and second shells of neighbors: Fourier transform (left) and EXAFS oscillations (right), a) Mo<sub>2</sub>C/TiO<sub>2</sub> and b) Mo<sub>2</sub>C/ZSM-5.

**Table S2.** Fitted parameters at the Mo K-edge ( $E_0 = 20013$  eV,  $S_0^2 = 0.98$ ) determined from the EXAFS analysis of spectra recorded at room temperature on catalysts after passivation and reduction in  $H_2$ .  $k = 3.5 - 15 \text{ \AA}^{-1}$ . Fit of the first peak(s) from the Fourier transform between 1 and 3  $\text{\AA}$ .

| Catalyst                                                                                    | Backscatter | N             | $\sigma^2 (\text{\AA}^2) \times 10^3$ | R ( $\text{\AA}$ ) |
|---------------------------------------------------------------------------------------------|-------------|---------------|---------------------------------------|--------------------|
| $\beta$ - $Mo_2C$                                                                           | C           | $2.7 \pm 0.9$ | $4.1 \pm 0.3$                         | $2.08 \pm 0.02$    |
|                                                                                             | Mo          | $7.3 \pm 0.8$ | $5.7 \pm 0.5$                         | $2.966 \pm 0.005$  |
| $\Delta E_0 = -5.5$ eV, r-factor = 0.01575, $\chi^2 = 592$ , $N_{ind} = 13$ , $N_{var} = 7$ |             |               |                                       |                    |
| $Mo_2C/SiO_2$                                                                               | C           | $4.1 \pm 0.6$ | $6 \pm 1$                             | $2.105 \pm 0.006$  |
|                                                                                             | Mo          | $4.1 \pm 0.4$ | $6.1 \pm 0.4$                         | $2.976 \pm 0.003$  |
| $\Delta E_0 = -2.7$ eV, r-factor = 0.00717, $\chi^2 = 202$ , $N_{ind} = 13$ , $N_{var} = 7$ |             |               |                                       |                    |
| $Mo_2C/TiO_2$                                                                               | C           | $4.0 \pm 0.7$ | $5 \pm 2$                             | $2.13 \pm 0.01$    |
|                                                                                             | Mo          | $0.3 \pm 0.2$ | $8 \pm 2$                             | $2.49 \pm 0.04$    |
|                                                                                             | Mo          | $2.3 \pm 0.7$ | $8 \pm 2$                             | $2.977 \pm 0.009$  |
| $\Delta E_0 = -0.1$ eV, r-factor = 0.01630, $\chi^2 = 514$ , $N_{ind} = 13$ , $N_{var} = 9$ |             |               |                                       |                    |
| $Mo_2C/ZSM-5$                                                                               | C           | $3.9 \pm 0.7$ | $8 \pm 2$                             | $2.10 \pm 0.01$    |
|                                                                                             | Mo          | $0.7 \pm 0.5$ | $9 \pm 2$                             | $2.69 \pm 0.02$    |
|                                                                                             | Mo          | $3.0 \pm 0.9$ | $9 \pm 2$                             | $2.980 \pm 0.009$  |
| $\Delta E_0 = -2.9$ eV, r-factor = 0.01134, $\chi^2 = 271$ , $N_{ind} = 13$ , $N_{var} = 9$ |             |               |                                       |                    |
